# Supplementary material for: Injectable Non-leaching Tissue-mimetic Bottlebrush Elastomers: A New Platform for Advancing Reconstructive Surgery
Source: Research Square preprint supplement (doi:10.21203/rs.3.rs-100872/v1), 2020-11-11
Supplement: Supplementary file 1 [file 7ead286b8479c4c098c6fecd.pdf]

# Supporting Information

## Injectable Non-leaching Tissue-mimetic Bottlebrush Elastomers: A New Platform for Advancing Reconstructive Surgery

Erfan Dashtimoghadam<sup>1</sup>, Farahnaz Fahimipour<sup>1</sup>, Andrew N. Keith<sup>1</sup>, Foad Vashahi<sup>1</sup>, Pavel  
Popryadukhin<sup>2</sup>, Mohammad Vatankhah-Varnosfaderani<sup>1</sup>, Sergei S. Sheiko<sup>1\*</sup>

<sup>1</sup>*Department of Chemistry, University of North Carolina at Chapel Hill, 27599, USA*

<sup>2</sup>*Institute of Macromolecular Compounds of the Russian Academy of Sciences, St. Petersburg, Russia*

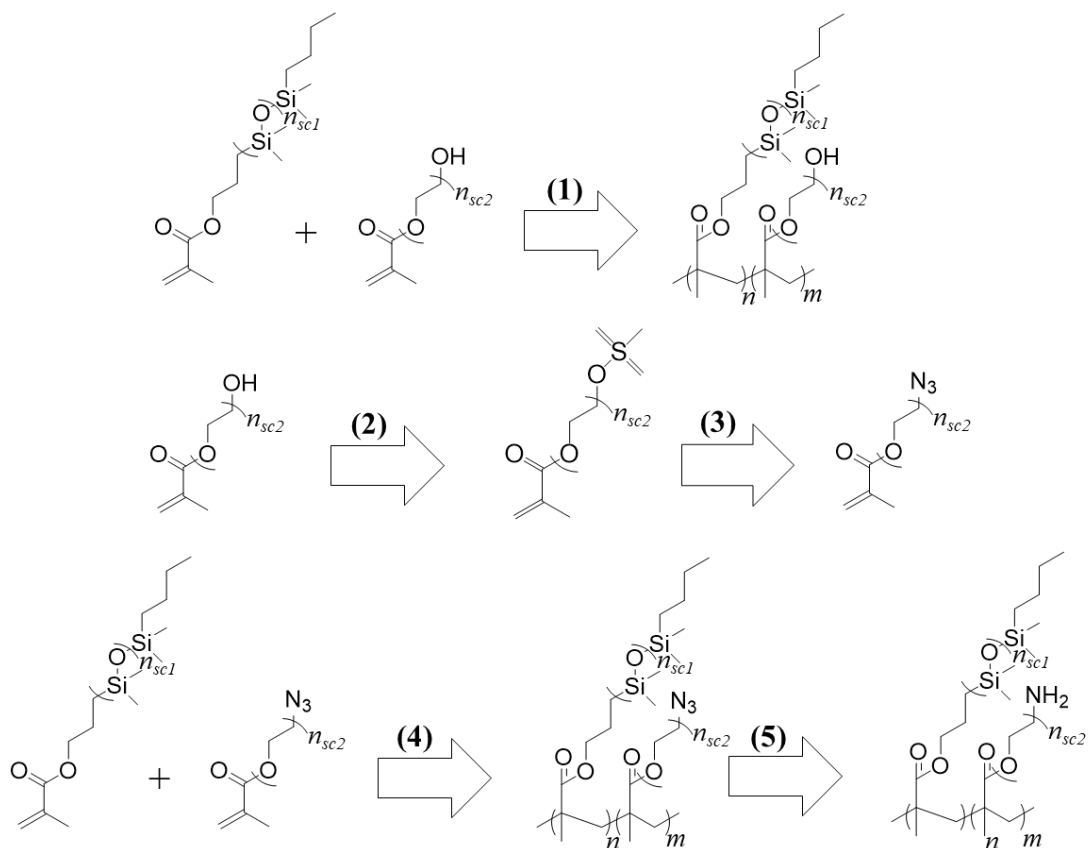

**Figure S1.** Synthesis of functional bottlebrush polymers and macromonomers: **(1)** synthesis of random polydimethylsiloxane-poly(ethylene glycol) bottlebrush copolymer (PDMS-*r*-PEG) through controlled radical copolymerization of polydimethylsiloxane-methacrylate (PDMSMA) and polyethyleneglycol-methacrylate (PEGMA) macromonomers, **(2)** mesylation of PEGMA macromonomer, **(3)** synthesis of azide-terminated PEGMA from mesylated macromonomer, **(4)** synthesis of random polydimethylsiloxane/azide-terminated poly(ethylene glycol) (PDMS-*r*-PEG.N<sub>3</sub>) bottlebrush copolymer, and **(5)** reduction of PDMS-*r*-PEG.N<sub>3</sub> to achieve PDMS-*r*-PEG.NH<sub>2</sub> bottlebrush copolymer (for details of illustrated reactions, please see Methods Section).

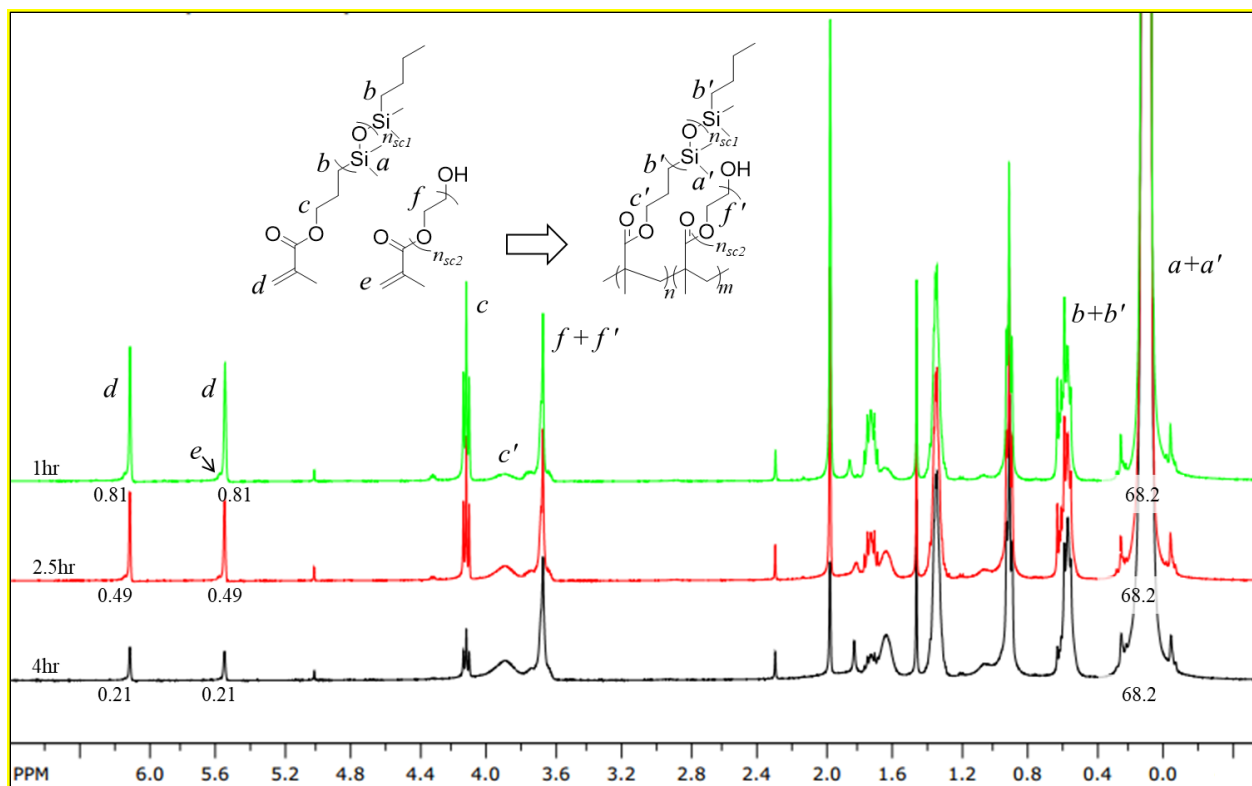

**Figure S2.**  $^1\text{H}$ -NMR growth of a random polydimethylsiloxane-poly(ethylene glycol) brush (PDMS-*r*-PEG,  $n:m$ , 95:5,  $n_{sc1}$ : 14,  $n_{sc2}$ : 12) (400 MHz,  $\text{CDCl}_3$ ): 6.16, 5.57 ( $\text{CH}_2=\text{C}(\text{CH}_3)\text{C}=\text{O}$ , PDMS and PEG macromonomer mixture, s, 1H), 4.12 ( $\text{CO}-\text{OCH}_2-$ , PDMS macromonomer, t, 2H), 3.91 ( $\text{CO}-\text{OCH}_2-$ , PDMS brush, t, 2H), 3.78 ( $\text{CO}-\text{OCH}_2-$ , PEG brush, t, 2H), 3.67 ( $-\text{OC}_2\text{H}_4\text{O}-$ , PEG brush, m, 32H), 0.55 ( $-\text{CH}_2-(\text{Si}(\text{CH}_3)_2-\text{O})_n-\text{CH}_2-\text{CH}_2-$ , PDMS macromonomer and brush mixture, m, 4H), 0.09 ( $-(\text{Si}(\text{CH}_3)_2-\text{O})_n-$ , PDMS macromonomer and brush mixture, s, 68.2H).  $\text{Conv}_{\text{PDMS}} = ([\text{Area}(a + a')/68.2] - [\text{Area}(d)/1])/[\text{Area}(a + a')/68.2] = 79\%$ .  $n_{bb} = \text{Conv}_{\text{PDMS}} * \frac{[\text{M}]}{[\text{I}]} = 79\% * 1125 = 889$ .

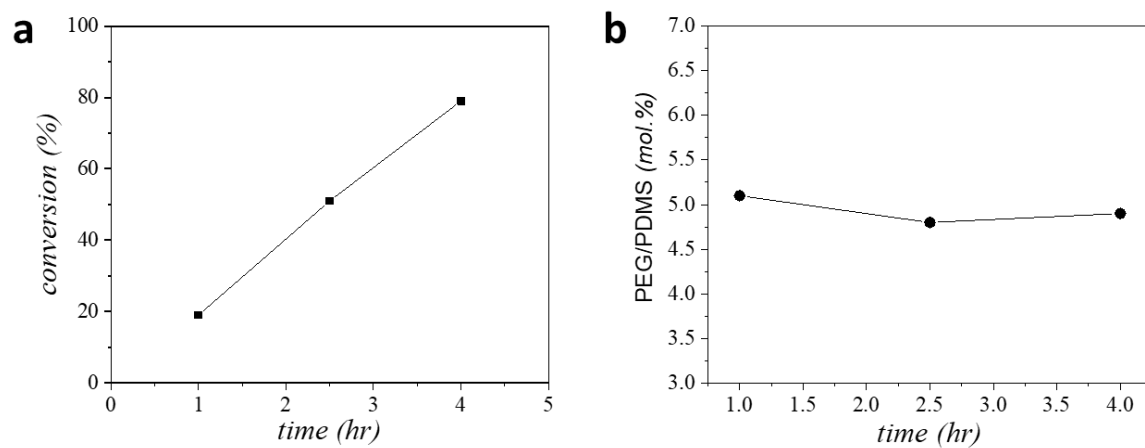

**Figure S3. a,** Growth kinetics of random polydimethylsiloxane-poly(ethylene glycol) (PDMS-*r*-PEG) copolymer bottlebrushes. **b,** Molar ratio of PEG during copolymerization.

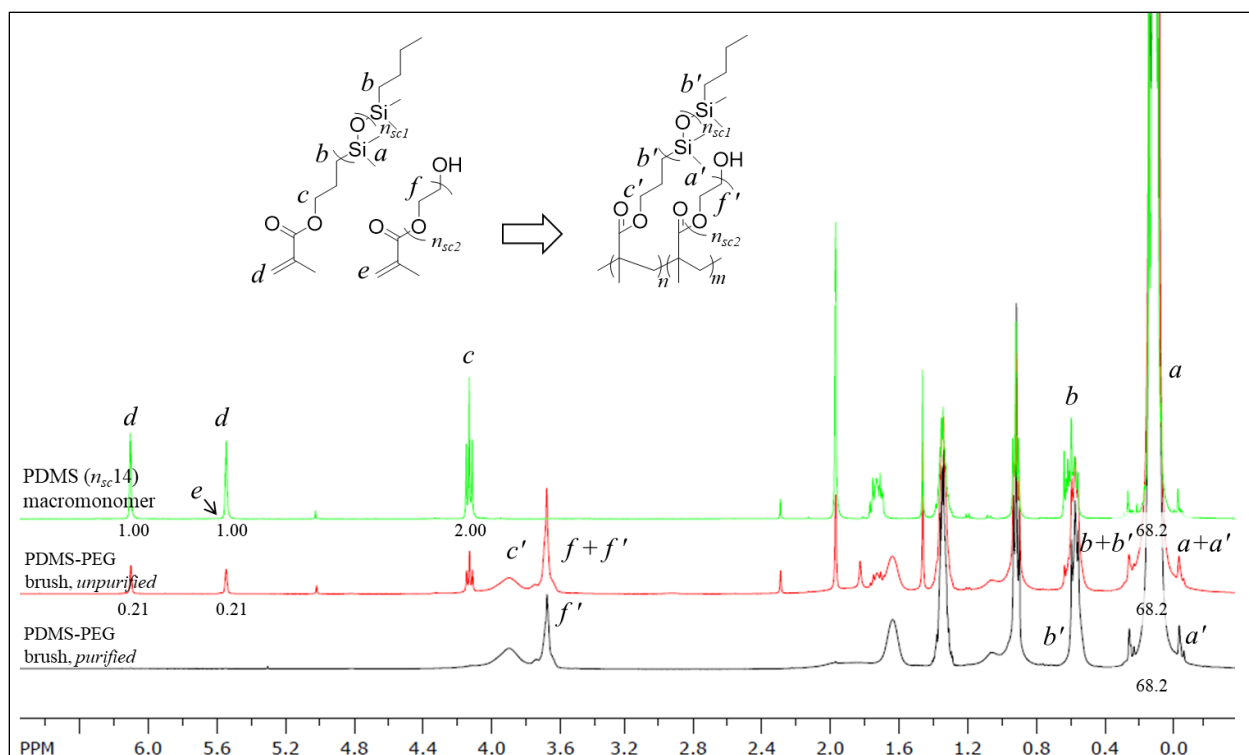

**Figure S4.** <sup>1</sup>H-NMR of random polydimethylsiloxane-poly(ethylene glycol) brushes (PDMS-*r*-PEG, *n*:*m*, 95:5, *n<sub>sc1</sub>*: 14, *n<sub>sc2</sub>*: 12) at different stages of synthesis (400 MHz, CDCl<sub>3</sub>): 6.16, 5.57 (CH<sub>2</sub>=C(CH<sub>3</sub>)C=O, PDMS macromonomer, s, 1H), 4.12 (CO-OCH<sub>2</sub>-, PDMS macromonomer, t, 2H), 3.91 (CO-OCH<sub>2</sub>-, PDMS brush, t, 2H), 3.78 (CO-OCH<sub>2</sub>-, PEG brush, t, 2H), 3.67 (-OC<sub>2</sub>H<sub>4</sub>O-, PEG brush, m, 32H), 0.55 (-CH<sub>2</sub>-(Si(CH<sub>3</sub>)<sub>2</sub>-O)-CH<sub>2</sub>-CH<sub>2</sub>-, PDMS macromonomer and brush mixture, m, 4H), 0.09 (-Si(CH<sub>3</sub>)<sub>2</sub>-O)-, PDMS macromonomer and brush mixture, s, 68.2H)

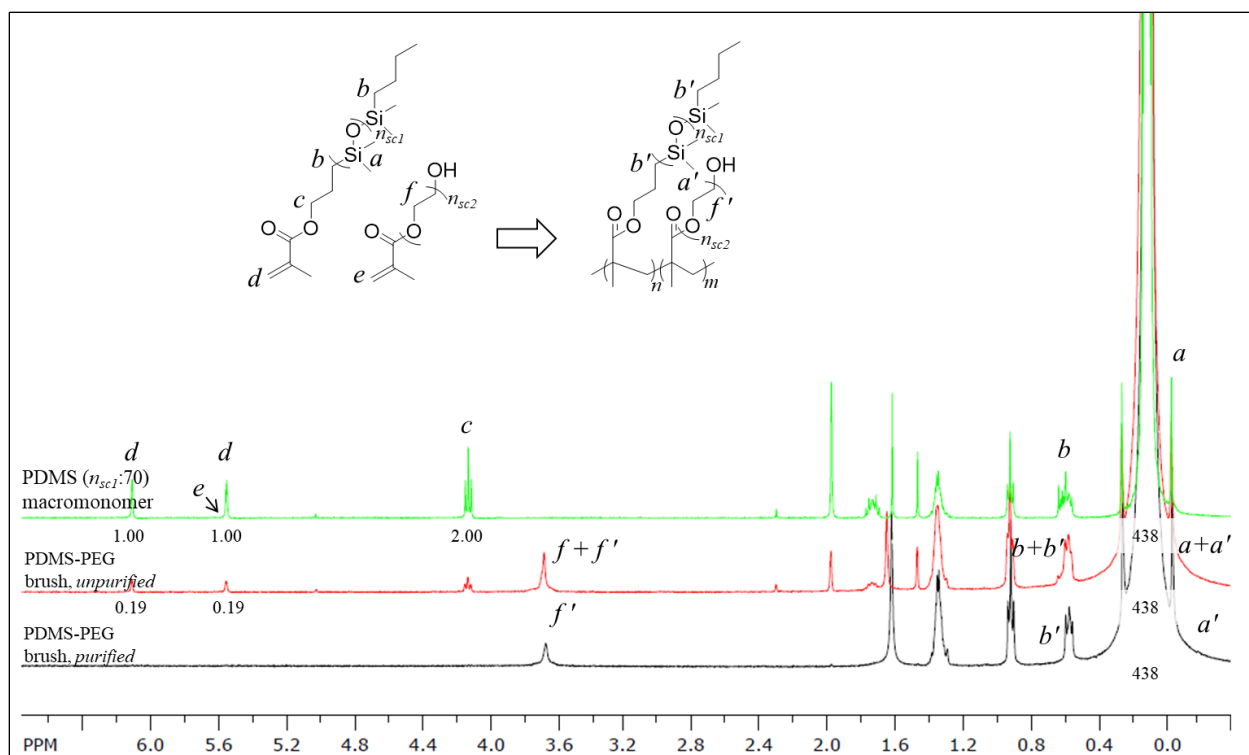

**Figure S5.**  $^1\text{H}$ -NMR of random polydimethylsiloxane-poly(ethylene glycol) brushes (PDMS-*r*-PEG,  $n:m$ , 95:5,  $n_{sc1}$ : 70,  $n_{sc2}$ : 12) at different stages of synthesis (400 MHz,  $\text{CDCl}_3$ ): 6.16, 5.57 ( $\text{CH}_2=\text{C}(\text{CH}_3)\text{C}=\text{O}$ , PDMS macromonomer, s, 1H), 4.12 ( $\text{CO}-\text{OCH}_2-$ , PDMS macromonomer, t, 2H), 3.91 ( $\text{CO}-\text{OCH}_2-$ , PDMS brush, t, 2H), 3.78 ( $\text{CO}-\text{OCH}_2-$ , PEG brush, t, 2H), 3.67 ( $-\text{OC}_2\text{H}_4\text{O}-$ , PEG brush, m, 32H), 0.55 ( $-\text{CH}_2-(\text{Si}(\text{CH}_3)_2-\text{O})_n-\text{CH}_2-\text{CH}_2-$ , PDMS macromonomer and brush mixture, m, 4H), 0.09 ( $-(\text{Si}(\text{CH}_3)_2-\text{O})_n-$ , PDMS macromonomer and bottlebrush mixture, s, 438H). Peak  $c'$  for brushes with  $n_{sc1}$ : 70 do not show on NMR in  $\text{CDCl}_3$  in contrast to  $n_{sc3}$ : 14 brushes.  $\text{Conv}_{\text{PDMS}} = ([\text{Area}(a + a')/438] - [\text{Area}(d)/1])/[\text{Area}(a)/438] = 81\%$ .  $n_{bb} = \text{Conv}_{\text{PDMS}} * \frac{[M]}{[I]} = 81\% * 375 = 304$ .

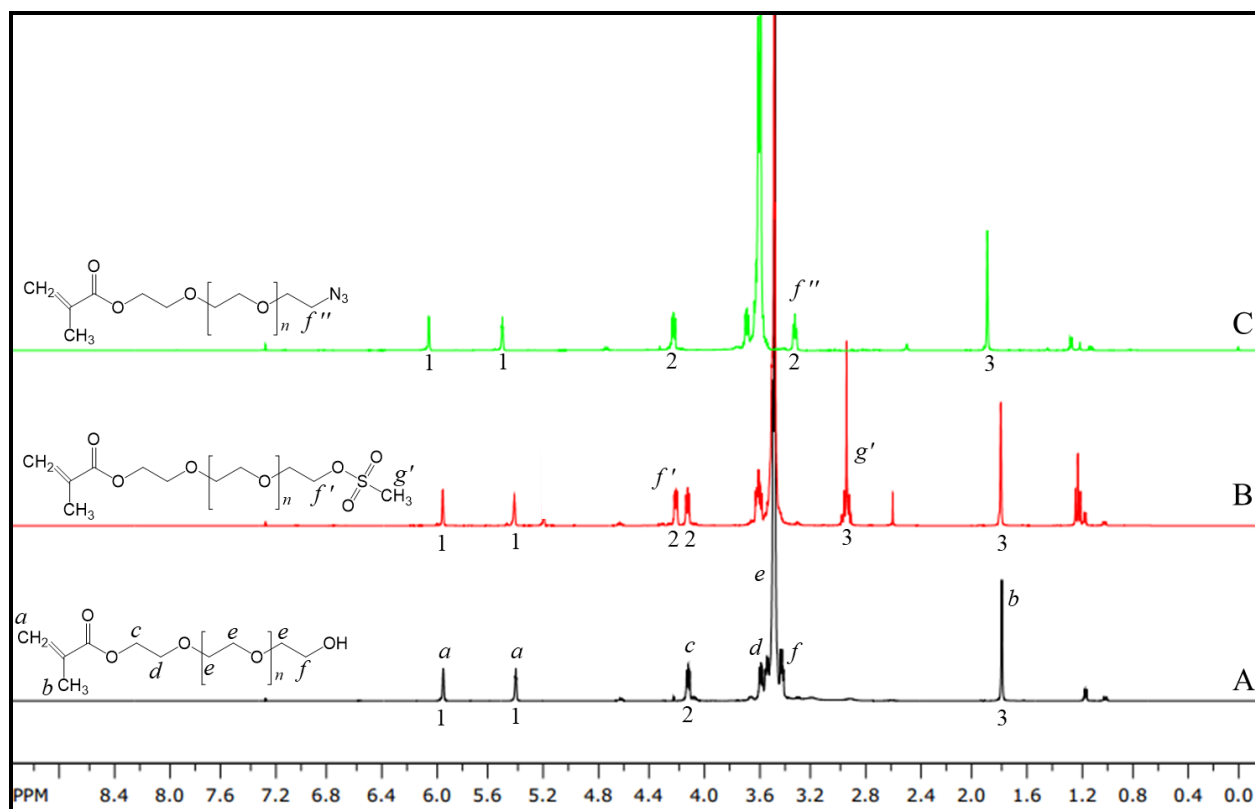

**Figure S6.**  $^1\text{H}$ -NMR of poly(ethylene glycol) macromonomer functionalization at different stages. **A**, poly(ethylene glycol) (PEG) macromonomer (400 MHz,  $\text{CDCl}_3$ ): 5.98, 5.41 ( $\text{CH}_2=\text{C}(\text{CH}_3)\text{C}=\text{O}$ , s, 1H), 4.15 ( $\text{CO}-\text{OCH}_2-$ , t, 2H), 3.59 ( $\text{CO}-\text{OCH}_2-\text{CH}_2\text{O}-$ , t, 2H), 3.48 ( $-\text{OC}_2\text{H}_4\text{O}-$ , m, 32H), 3.42 ( $-\text{CH}_2\text{OH}$ , t, 2H), 1.8 ( $\text{CH}_2=\text{C}(\text{CH}_3)\text{C}=\text{O}$ , s, 3H). **B**, PEG macromonomer after mesylation reaction (400 MHz,  $\text{CDCl}_3$ ): 5.98, 5.41 ( $\text{CH}_2=\text{C}(\text{CH}_3)\text{C}=\text{O}$ , s, 1H), 4.22 ( $-\text{CH}_2\text{OSO}_2\text{CH}_3$ , t, 2H), 4.15 ( $\text{CO}-\text{OCH}_2-$ , t, 2H), 3.59 ( $\text{CO}-\text{OCH}_2-\text{CH}_2\text{O}-$ , t, 2H), 3.48 ( $-\text{OC}_2\text{H}_4\text{O}-$ , m, 32H), 2.96 ( $-\text{CH}_2\text{OSO}_2\text{CH}_3$ , s, 3H), 1.8 ( $\text{CH}_2=\text{C}(\text{CH}_3)\text{C}=\text{O}$ , s, 3H). **C**, azide-terminated PEG macromonomer (400 MHz,  $\text{CDCl}_3$ ): 6.05, 5.52 ( $\text{CH}_2=\text{C}(\text{CH}_3)\text{C}=\text{O}$ , s, 1H), 4.21 ( $\text{CO}-\text{OCH}_2-$ , t, 2H), 3.68 ( $\text{CO}-\text{OCH}_2-\text{CH}_2\text{O}-$ , t, 2H), 3.60 ( $-\text{OC}_2\text{H}_4\text{O}-$ , m, 32H), 3.37 ( $-\text{CH}_2\text{N}_3$ , t, 2H), 1.90 ( $\text{CH}_2=\text{C}(\text{CH}_3)\text{C}=\text{O}$ , s, 3H).

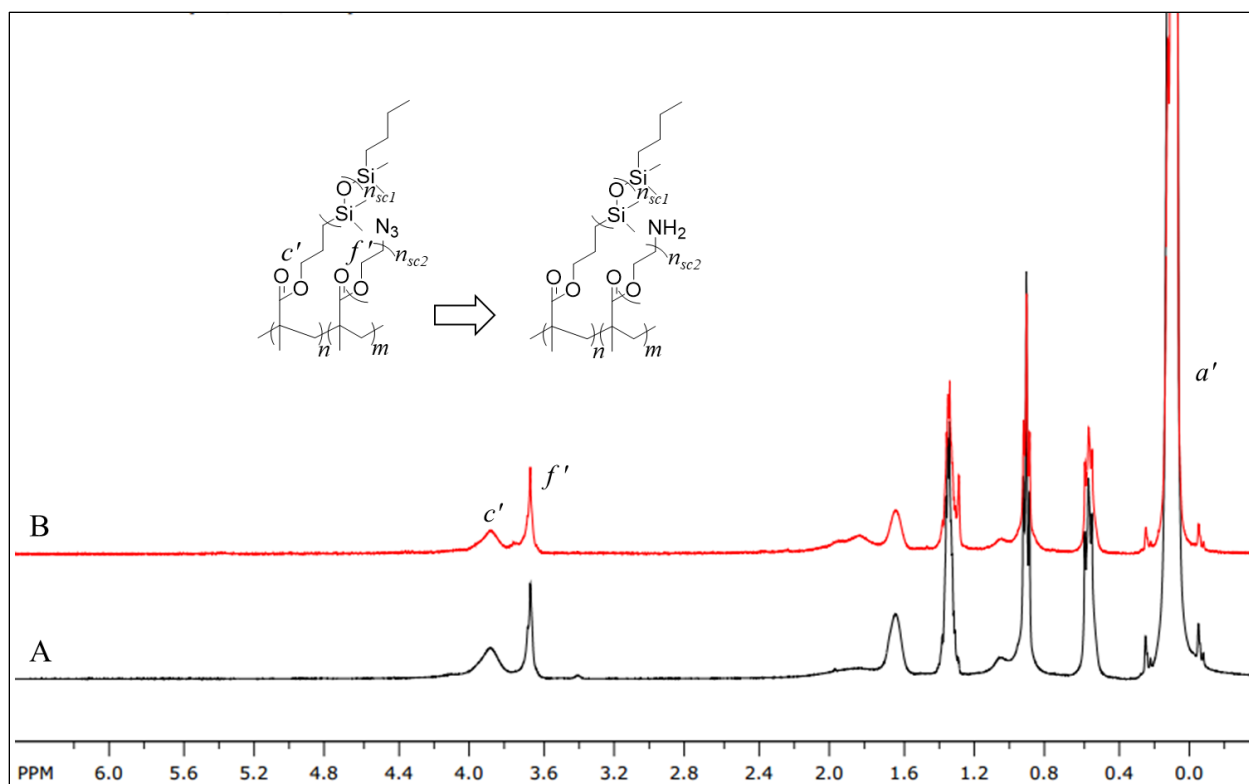

**Figure S7.**  $^1H$ -NMR (400 MHz,  $CDCl_3$ ) of **A**, random polydimethylsiloxane/azide-terminated poly(ethylene glycol) (PDMS-*r*-PEG. $N_3$ ), and **B**, random polydimethylsiloxane/amine-terminated poly(ethylene glycol) (PDMS-*r*-PEG. $NH_2$ ) bottlebrush copolymer.



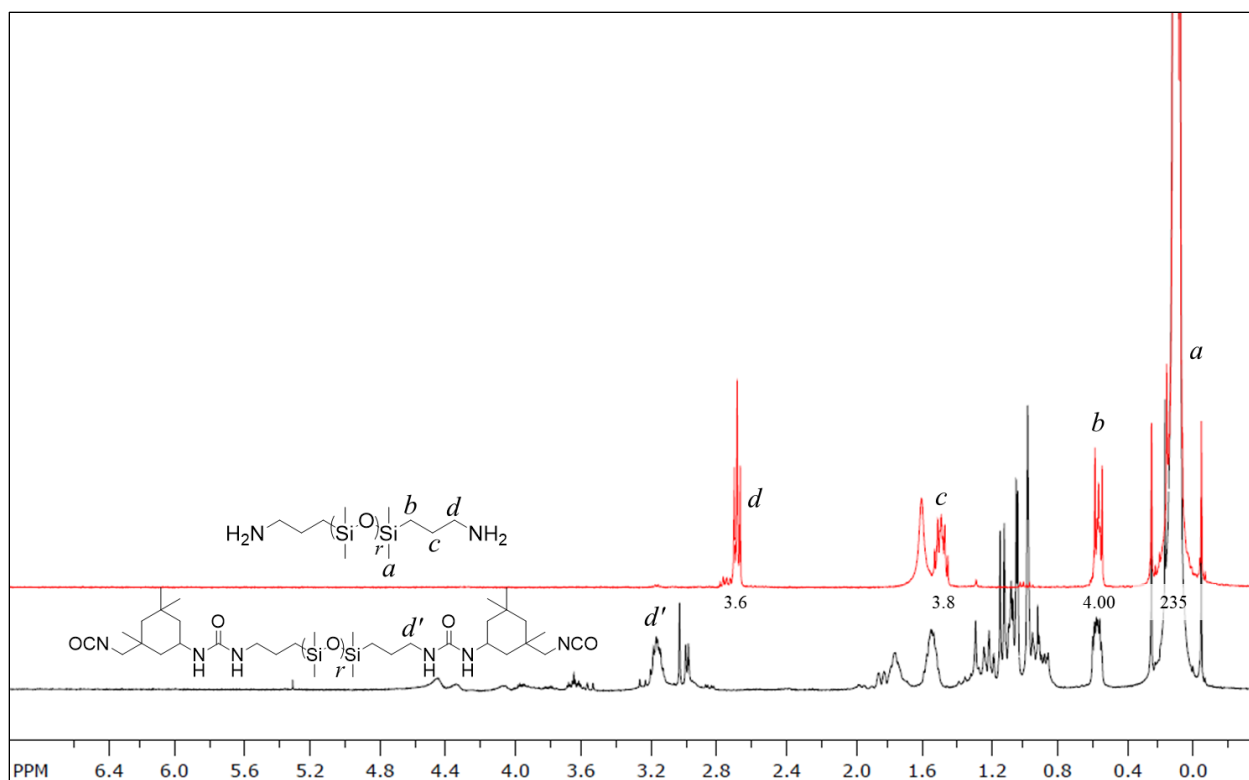

**Figure S8.**  $^1\text{H}$ -NMR of polydimethylsiloxane diisocyanate crosslinker (NCO.PDMS.NCO) at different stages of synthesis (400 MHz,  $\text{CDCl}_3$ ): 3.18 ( $-\text{CH}_2-\text{NH}_2-$ , crosslinker, t, 2H) 2.69 ( $-\text{CH}_2-\text{NH}_2$ , t, 2H), 0.09 ( $-(\text{Si}(\text{CH}_3)_2-\text{O})_n-$ , s, 235H).

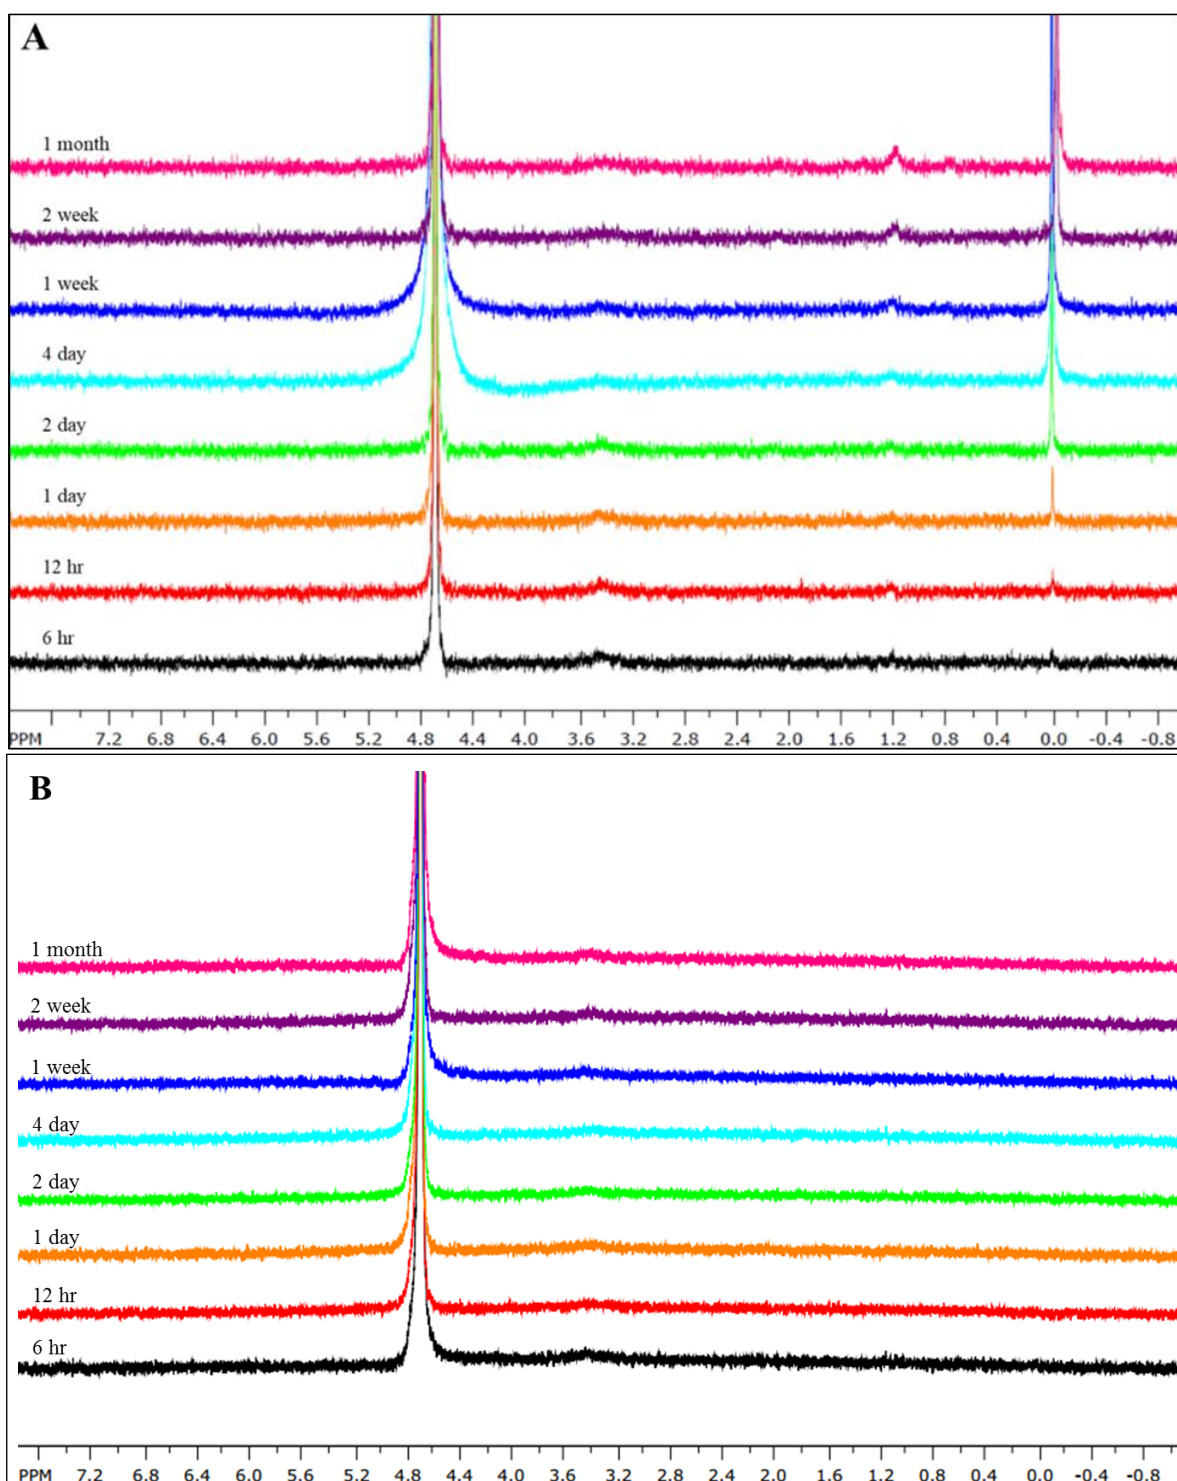

**Figure S9.** Leachability of injectable elastomer compared to a commercial silicone gel implant into aqueous medium. **A**, Time-resolved <sup>1</sup>H-NMR of sol extract from a commercial silicone gel used in breast implants (*Silicone Gel-1* in **Figure S9**) in aqueous medium monitored over one month (400 MHz, CDCl<sub>3</sub>): 4.70 (Residual H<sub>2</sub>O), 1.17, 0.01 (leachable materials). **B**, Time-resolved <sup>1</sup>H-NMR of sol extract from a NCO:OH (1:8) injectable elastomer in aqueous medium monitored over a month (400 MHz, D<sub>2</sub>O): 4.70 (Residual H<sub>2</sub>O); no leachables observed.

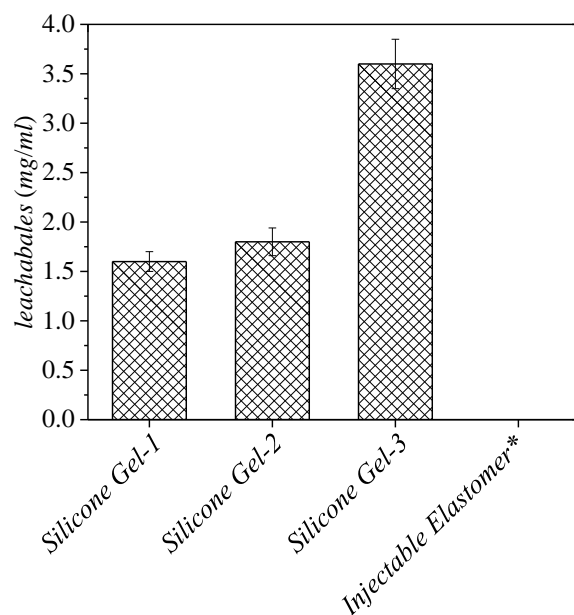

**Figure S10.** Leachability of three types of commercial silicone gel implants into aqueous medium over a month compared to the injectable elastomer\* of NCO:OH (1:8) (400 MHz,  $\text{CDCl}_3$ ); data shows mass of leachables from 5 gr gel after one month incubation in 10 ml aqueous medium at room temperature.

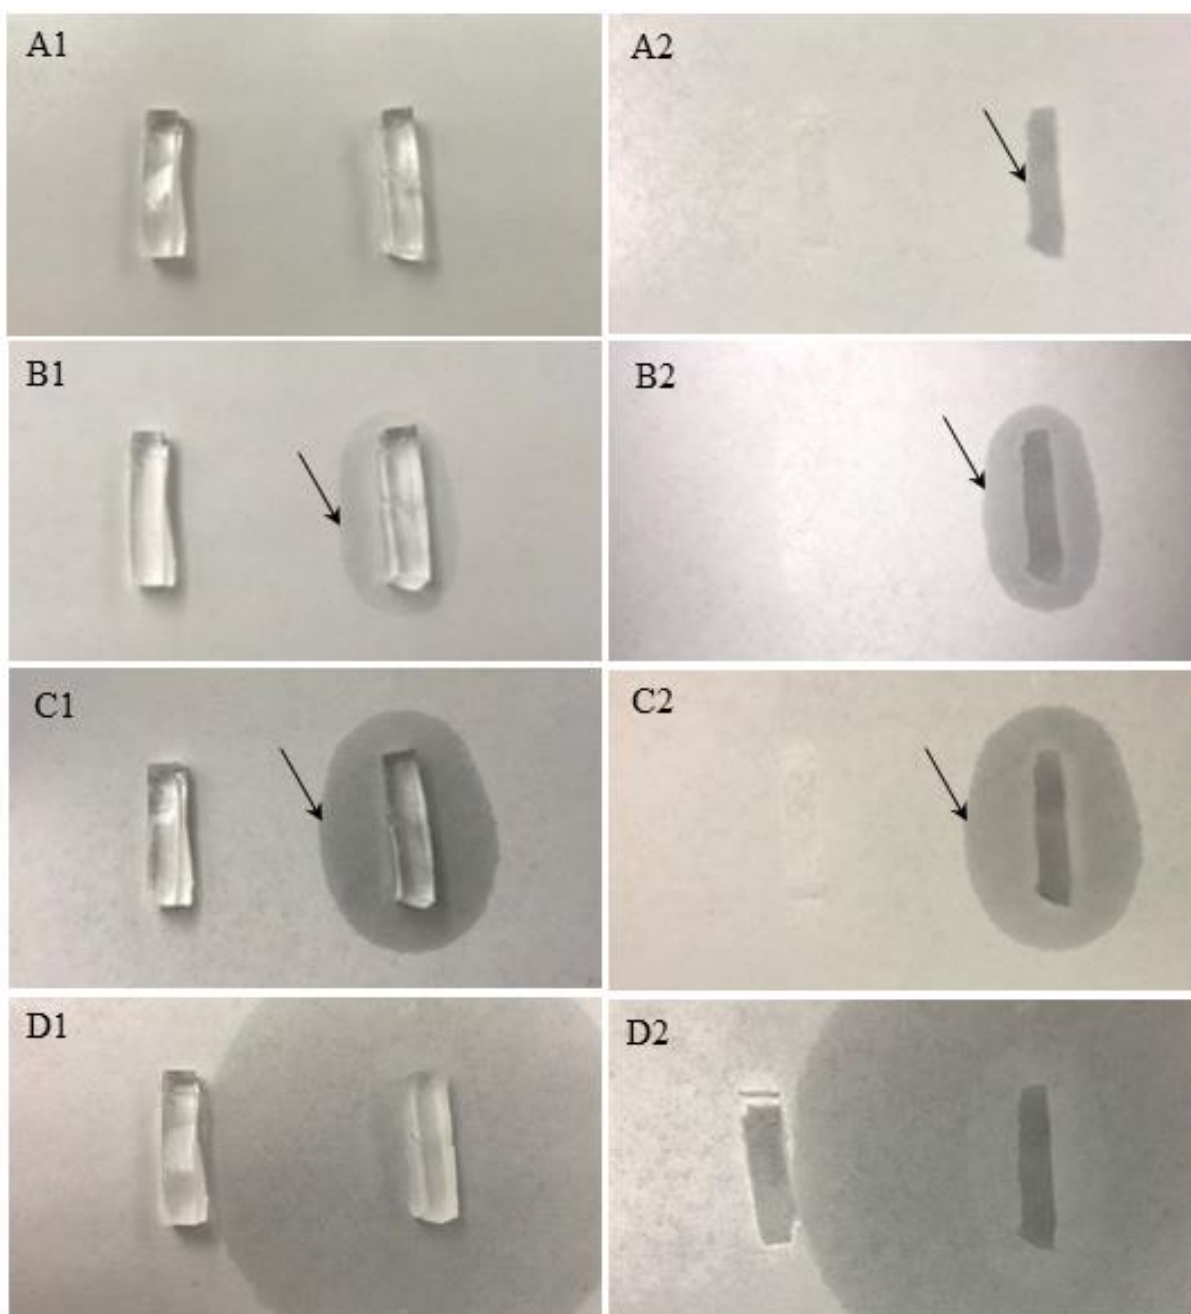

**Figure S11.** Leachability of a commercial silicone gel used in breast implants (*Silicone Gel-1*) (the right sample in each image) on a paper substrate compared to the injectable elastomer of NCO:OH (1:8) (the left sample in each image). (A1) Front image after 1 hour, (A2) back image after 1 hour, (B1) front image after 1 week, (B2) back image after 1 week, (C1) front image after 1 week, (C2) back image after 1 week, (D1) front image after 1 month, and (D2) back image after 1 month. The leached component from the commercial silicone gel was shown with black arrows.

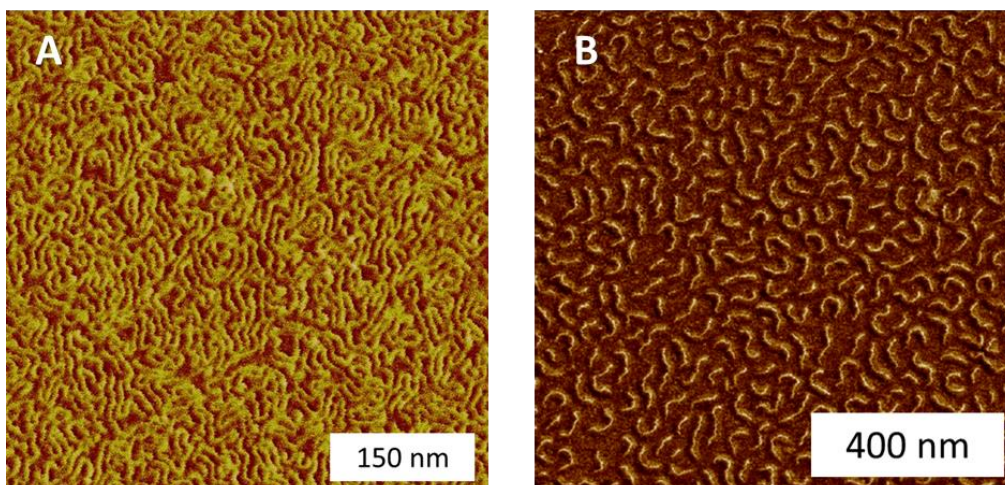

**Figure S12.** Atomic Force Microscopy of brush polymers. Height micrographs of PDMS-*r*-PEG bottlebrushes deposited on mica by Langmuir-Blodgett technique for PDMS: **A**,  $n_{sc}14$ , and **B**,  $n_{sc}70$ .  $n_{bb}$  is determined as  $L_n/l_0$ , where  $L_n$  is number average measured bottlebrush contour length *via* AFM and  $l_0 = 0.25$  nm is the length of bottlebrush backbone monomeric unit. Bottlebrush dispersity,  $\mathcal{D} = M_w/M_n$  is calculated from analysis of  $> 300$  molecules.

**Table S1.** Molecular characterization of PDMS-*r*-PEG bottlebrushes.

| Brush Polymer | $n_{bb}$ (NMR) <sup>(1)</sup> | $n_{bb}$ (AFM) <sup>(2)</sup> | $\mathcal{D}$ (AFM) <sup>(3)</sup> |
|---------------|-------------------------------|-------------------------------|------------------------------------|
| $n_{sc}14$    | 889                           | 856±55                        | 1.18                               |
| $n_{sc}70$    | 304                           | 281±35                        | 1.16                               |

<sup>(1)</sup> Number average degree of polymerization of PDMS-*r*-PEG bottlebrush ( $n_{bb}$ ) determined by <sup>1</sup>H-NMR, <sup>(2)</sup>  $n_{bb}$ , and <sup>(3)</sup> dispersity ( $\mathcal{D}$ ) of bottlebrushes determined by AFM (**Figure S8**).  $n_{bb}$  was determined by AFM as  $L_n/l_0$ , where  $L_n$  is number average measured bottlebrush contour length *via* AFM and  $l_0 = 0.25$  nm is the length of bottlebrush backbone monomeric unit. Contour length was measured *via* in-house software. Bottlebrush dispersity,  $\mathcal{D} = M_w/M_n$  was calculated based on analysis of ensembles of  $> 300$  molecules to ensure standard deviation of the mean  $< 10\%$ .

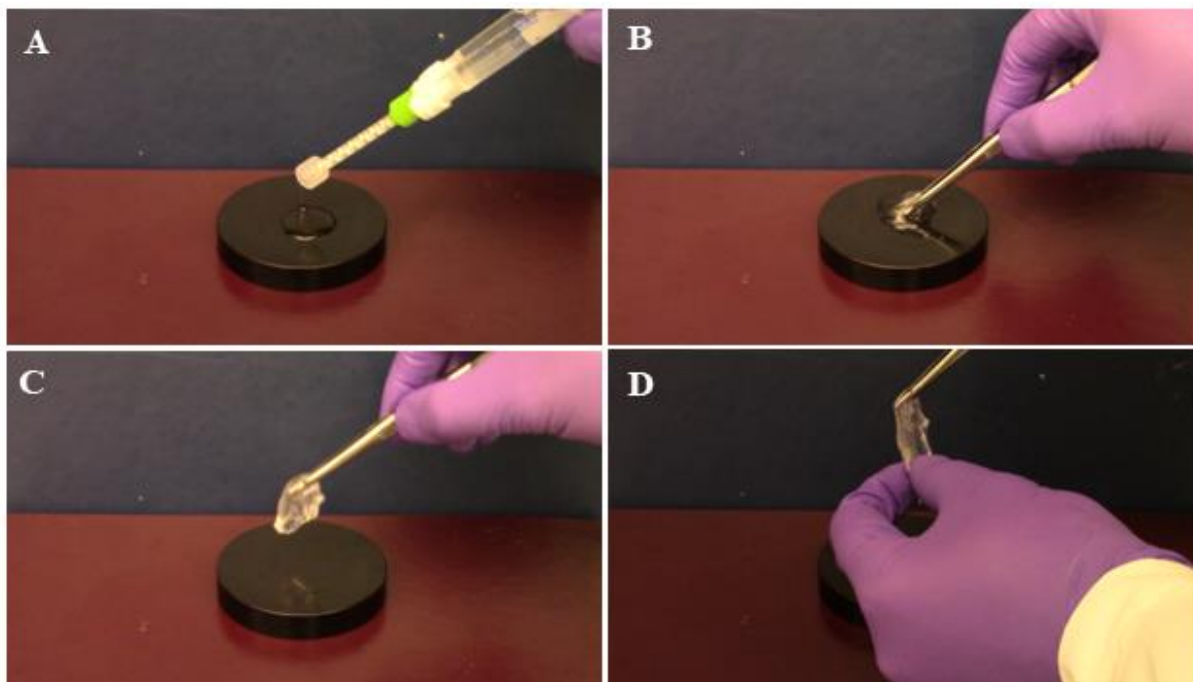

**Figure S13.** Injectable elastomers: **A**, double-syringe injection, **B**, curing at room temperature, **C**, handling, and **D**, super-soft tissue-mimetic mechanics (Supplementary Video 1).

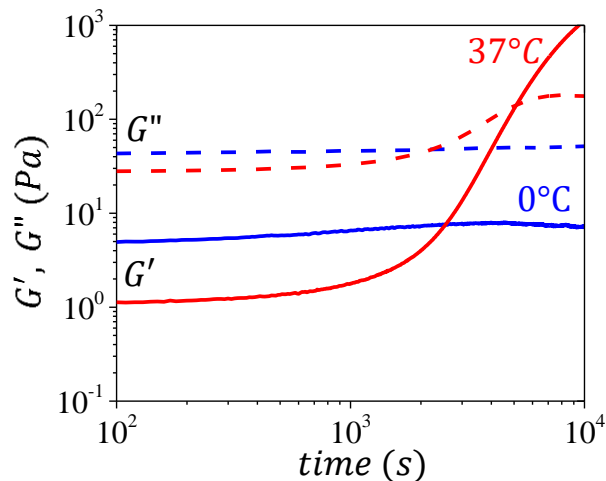

**Figure S14.** Evolution of elastic ( $G'$ ) and loss modulus ( $G''$ ) as a function of time for injectable elastomers composed of brush chains with hydroxyl groups cured with a macromolecular diisocyanate crosslinker NCO:OH (1:1) at temperatures of 0 and 37°C. The premixed injectable formulation shows gelation at elevated temperature (37°C), while it remains fluid at low temperature (0°C). The formulation remained fluid after 2 months storage at -20°C, and showed gelation with increasing temperature.

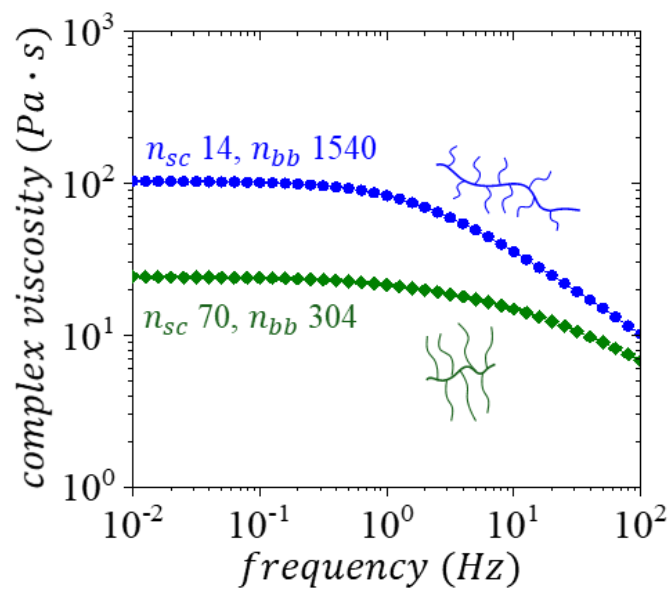

**Figure S15.** Polydimethylsiloxane (PDMS) bottlebrushes with longer side chains, yet similar molecular weight ( $M_w = 1,540,000$ :  $n_{sc} 14$ ,  $n_{bb} 1540$  vs.  $M_w = 1,520,000$ :  $n_{sc} 70$ ,  $n_{bb} 304$ ) possess lower melt viscosity.



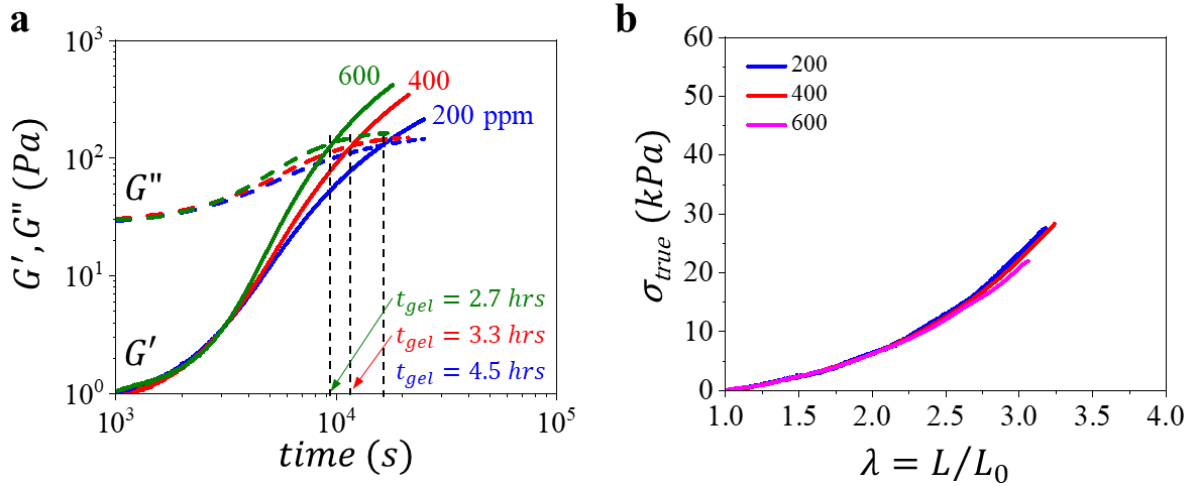

**Figure S16.** Decoupling gelation time ( $t_{gel}$ ) and tissue-mimetic mechanics of solvent-free supersoft injectable elastomers: **a**, Evolution of storage ( $G'$ ) and loss ( $G''$ ) moduli as a function of time for injectable elastomers comprising NCO:OH ratio 1:4 at different content of catalyst (200, 400, and 600 ppm). **b**, True stress-elongation ( $\sigma_{true}$ - $\lambda$ ) curve profiles of the injectable supersoft solvent-free elastomer comprising NCO:OH ratios 1:4 at different content of catalyst (200, 400, and 600 ppm).

**Table S2.** Structural and mechanical parameters of NCO:OH (1:4) injectable elastomers\* comprising different content of catalyst (200, 400, and 600 ppm (Fig. S16b).

| Catalyst <sup>1)</sup> | $n_{sc}$ <sup>2)</sup> | $n_{bb}$ <sup>3)</sup> | $n_x$ <sup>4)</sup> | $E$ (kPa) <sup>5)</sup> | $\beta$ <sup>6)</sup> | $E_0$ (kPa) <sup>7)</sup> | $\lambda_{max}^{exp}$ <sup>8)</sup> | $\lambda_{max}^{calc}$ <sup>9)</sup> |
|------------------------|------------------------|------------------------|---------------------|-------------------------|-----------------------|---------------------------|-------------------------------------|--------------------------------------|
| 200                    | 14                     | 889                    | 200                 | 4.32                    | 0.104                 | 5.03                      | 3.18                                | 3.10                                 |
| 400                    | 14                     | 889                    | 200                 | 4.35                    | 0.097                 | 5.00                      | 3.24                                | 3.21                                 |
| 600                    | 14                     | 889                    | 200                 | 4.23                    | 0.095                 | 4.85                      | 3.06                                | 3.24                                 |

<sup>1)</sup> Catalyst content (DBTDL, ppm). Degrees of polymerization (DP) of <sup>2)</sup> side-chains and <sup>3)</sup> backbone of bottlebrush macromolecules prior to crosslinking determined by <sup>1</sup>H-NMR. <sup>4)</sup> Nominal DP of the backbone strand between cross-links. <sup>5)</sup> Structural Young's modulus ( $G$ ) and <sup>6)</sup> strain-stiffening parameter obtained by fitting stress-strain curves with Equation 1. <sup>7)</sup> Young's modulus from Equation 2. <sup>8)</sup> Experimental elongation at break. <sup>9)</sup> Theoretical elongation at break as  $\lambda_{max,calc} = \beta^{-0.5}$ . \*The gel fraction of injectable elastomers was > 97%.

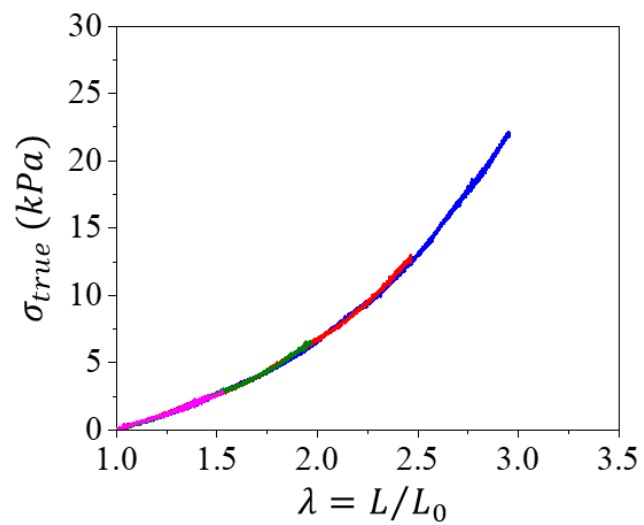

**Figure S17.** Cyclic loading-unloading curves of injectable elastomer prepared with NCO:OH molar ratio of 1:4 at elongation of  $\lambda = 1.5$  (pink), 2 (green), 2.5 (red), and 3 (blue).

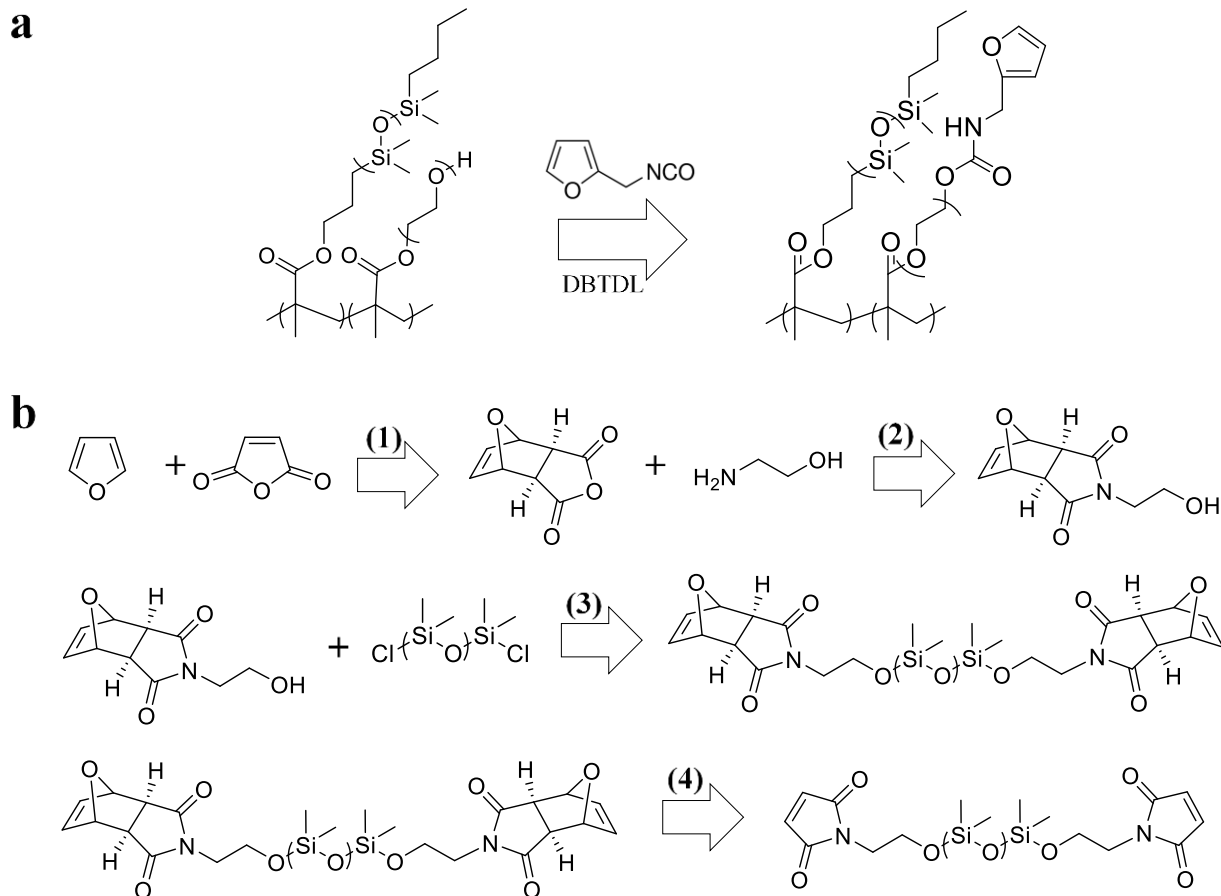

**Figure S18.** Synthesis of injectable dynamic tissue-mimetic elastomers: **a**, Synthesis of random polydimethylsiloxane-poly(ethylene glycol) (PDMS-*r*-PEG) bottlebrush macromolecules comprising furan moieties. **b**, Synthesis of a linear bifunctional polydimethylsiloxane (PDMS) crosslinker with maleimide moieties: (1) synthesis of *exo*-3,6-epoxy-1,2,3,6-tetrahydrophthalic anhydride (furan-protected maleic anhydride), (2) synthesis of 2-(2-hydroxyethyl)-3a,4,7,7a-tetrahydro-1H-4,7-epoxyisoindole-1,3(2H)-dione (furan-protected N-(2-hydroxyethyl) maleimide), (3) functionalization of chlorine terminated PDMS with furan-protected N-(2-hydroxyethyl) maleimide, (4) N-(2-hydroxyethyl) maleimide terminated PDMS as linear bifunctional crosslinker for injectable dynamic tissue-mimetic elastomers (for details of illustrated reactions, please see Methods Section).

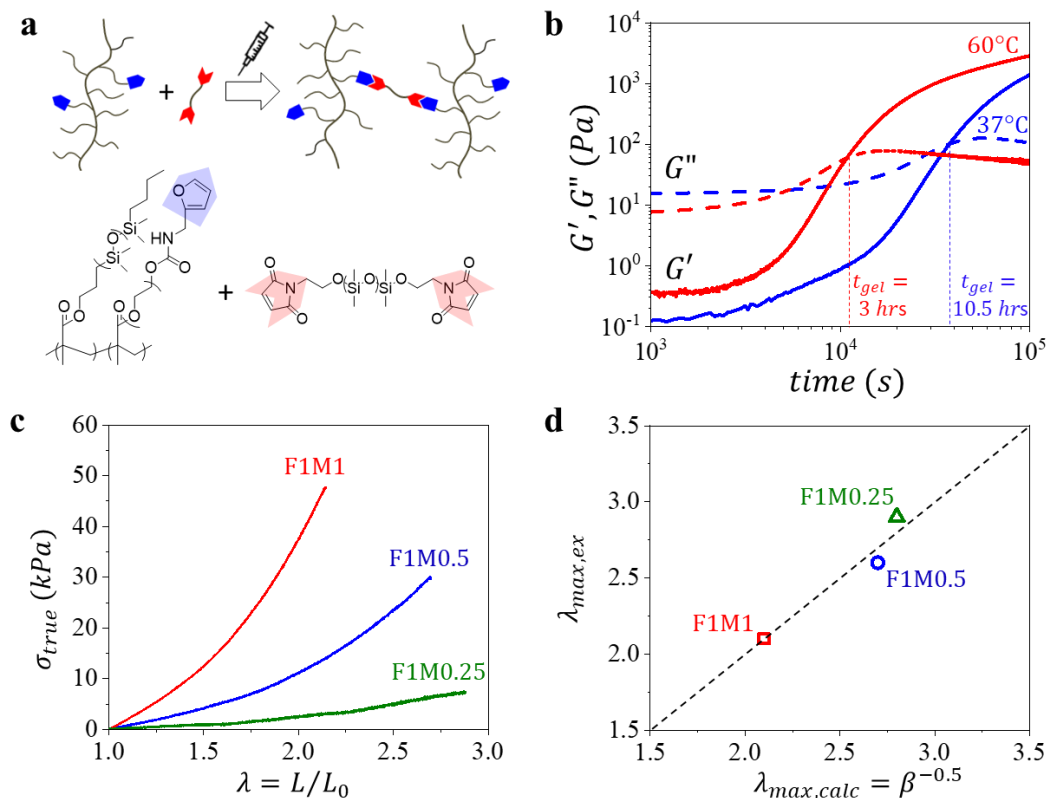

**Figure S19.** **a**, Injectable reversible tissue-mimetic elastomers composed of random polydimethylsiloxane-poly(ethylene glycol) (PDMS-*r*-PEG) comprising furan (F) moieties with a controlled fraction of a linear bifunctional crosslinker with maleimide (M) moieties (*e.g.*, F1M1 corresponds to 1:1 molar ratio). **b**, Evolution of storage ( $G'$ ) and loss ( $G''$ ) moduli as a function of time for injectable dynamic elastomer F1M1 at temperatures of 37 and 60°C. At 37 °C, the curing time was about 11h, which enables injection of bulky body implants during time-consuming surgery. **c**, True stress-elongation ( $\sigma_{true}$ - $\lambda$ ) curve profiles of the injectable dynamic tissue-mimetic elastomers. **d**, Experimental elongation-at-break ( $\lambda_{max,ex}$ ) demonstrates good agreement with the maximum strand elongation calculated as  $\lambda_{max,calc} = R_{max}/\sqrt{\langle R_{in}^2 \rangle} \equiv \beta^{-0.5}$ .

**Table S3.** Structural and mechanical parameters of injectable dynamic elastomers based on Diels-Alder chemistry (Fig. S19c).

| F:M <sup>1)</sup> | $n_{sc}$ <sup>2)</sup> | $n_{bb}$ <sup>3)</sup> | $n_x$ <sup>4)</sup> | $E$ (kPa) <sup>5)</sup> | $\beta$ <sup>6)</sup> | $E_0$ (kPa) <sup>7)</sup> | $\lambda_{max}^{exp}$ <sup>8)</sup> | $\lambda_{max}^{calc}$ <sup>9)</sup> | Gel fraction |
|-------------------|------------------------|------------------------|---------------------|-------------------------|-----------------------|---------------------------|-------------------------------------|--------------------------------------|--------------|
| F1M1              | 14                     | 889                    | 50                  | 15.3                    | 0.23                  | 22.3                      | 2.1                                 | 2.1                                  | > 98%        |
| F1M0.5            | 14                     | 889                    | 100                 | 6.3                     | 0.14                  | 7.8                       | 2.7                                 | 2.6                                  | > 96%        |
| F1M0.25           | 14                     | 889                    | 200                 | 1.5                     | 0.12                  | 1.8                       | 2.9                                 | 2.8                                  | > 91%        |

<sup>1)</sup> The ratio of furan (F) moieties on PDMS-*r*-PEG bottlebrushes to maleimide (M) moieties on linear bifunctional crosslinker (*e.g.*, F1M1 corresponds to 1:1 molar ratio). Degrees of polymerization (DP) of <sup>2)</sup> side-chains and <sup>3)</sup> backbone of bottlebrush macromolecules prior to crosslinking determined by <sup>1</sup>H-NMR. <sup>4)</sup> Nominal DP of the backbone strand between cross-links. <sup>5)</sup> Structural Young's modulus ( $G$ ) and <sup>6)</sup> strain-stiffening parameter obtained by fitting stress-strain curves with Equation 1. <sup>7)</sup> Young's modulus from Equation 2. <sup>8)</sup> Experimental elongation at break. <sup>9)</sup> Theoretical elongation at break as  $\lambda_{max,calc} = \beta^{-0.5}$ .

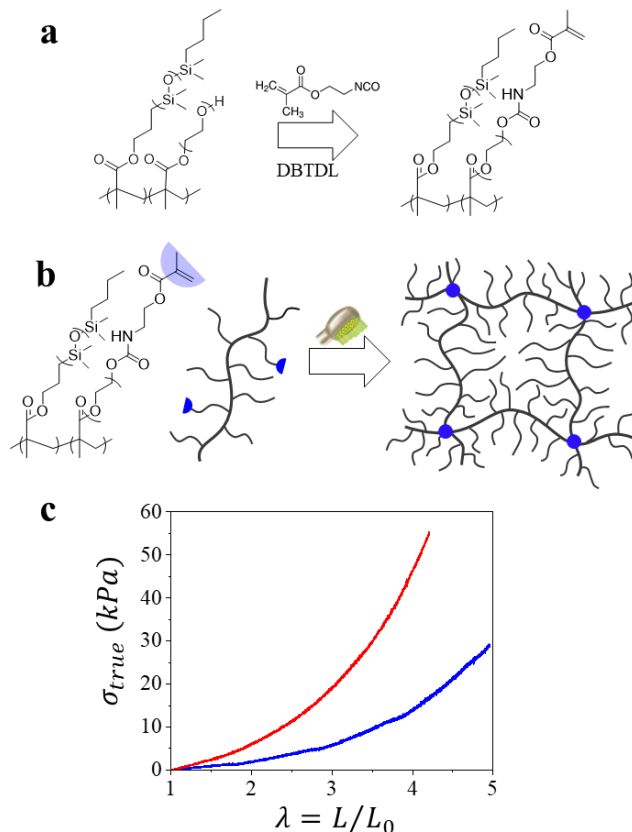

**Figure S20.** Synthesis of injectable photocurable tissue-mimetic elastomers: **a**, Injectable dynamic tissue-mimetic elastomers composed of random polydimethylsiloxane-poly(ethylene glycol) (PDMS-*r*-PEG) comprising photocurable methacrylate moieties. **b**, True stress-elongation ( $\sigma_{true}$ - $\lambda$ ) curve profiles of the injectable photocurable tissue-mimetic elastomers.

**Table S4.** Structural and mechanical parameters of injectable photocurable\* elastomers (Fig. S20c).

| network <sup>1)</sup> | $n_{sc}$ <sup>2)</sup> | $n_{bb}$ <sup>3)</sup> | $n_x$ <sup>4)</sup> | $E$ (kPa) <sup>5)</sup> | $\beta$ <sup>6)</sup> | $E_0$ (kPa) <sup>7)</sup> | $\lambda_{max}^{exp}$ <sup>8)</sup> | $\lambda_{max}^{calc}$ <sup>9)</sup> | gel fraction |
|-----------------------|------------------------|------------------------|---------------------|-------------------------|-----------------------|---------------------------|-------------------------------------|--------------------------------------|--------------|
| Photocure-1.5         | 14                     | 889                    | 100                 | 4.8                     | 0.06                  | 5.2                       | 4.2                                 | 4.1                                  | > 93%        |
| Photocure-3.0         | 14                     | 889                    | 200                 | 1.7                     | 0.05                  | 1.8                       | 4.9                                 | 4.5                                  | > 89%        |

<sup>1)</sup> Two injectable photocurable tissue-mimetic elastomers are composed of random polydimethylsiloxane-poly(ethylene glycol) (PDMS-*r*-PEG) comprising controlled fraction of PEG macromonomers with chains-end methacrylate moieties at 1.5 and 3 mol.%, respectively. Degrees of polymerization (DP) of <sup>2)</sup> side-chains and <sup>3)</sup> backbone of bottlebrush macromolecules prior to crosslinking determined by <sup>1</sup>H-NMR. <sup>4)</sup> Nominal DP of the backbone strand between cross-links. <sup>5)</sup> Structural Young's modulus ( $G$ ) and <sup>6)</sup> strain-stiffening parameter obtained by fitting stress-strain curves with eq 1. <sup>7)</sup> Young's modulus from eq 2. <sup>8)</sup> Experimental elongation at break. <sup>9)</sup> Theoretical elongation at break as  $\lambda_{max,calc} = \beta^{-0.5}$ .

\* The details of conditions of UV procedure is included in the Materials and Methods Section: Functional bottlebrushes were dried with dry N<sub>2</sub> flow until a constant mass was reached. The functionalized brushes were subsequently cured in the presence of diphenyl(2,4,6-trimethylbenzoyl)phosphine oxide/2-hydroxy-2-methylpropiophenone as photo-initiator under N<sub>2</sub> using a UV illumination chamber (365 nm UV lamp, 0.1 mW/cm<sup>2</sup>, 10 cm distance).

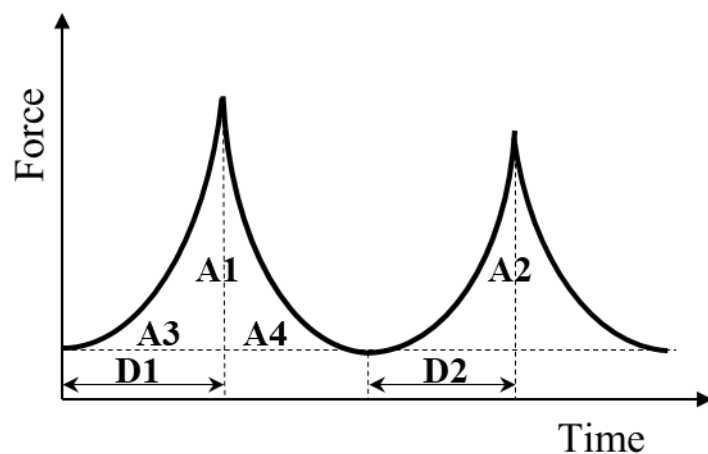

**Figure S21.** Schematic representation of determining the textural properties including springiness ( $D2/D1$ ), resilience ( $A4/A3$ ), and cohesiveness ( $A2/A1$ ) of injectable non-leaching tissue-mimetic elastomers and commercial implants composed of silicone gel. Texture profile analysis was conducted based on a double compression test.
